# Supplementary material for: High-performance ultra-violet phototransistors based on CVT-grown high quality SnS2flakes
Source: Royal Society of Chemistry journal article supplement (doi:10.1039/c9na00471h), 2019-01-01
Supplement: c9na00471h1.pdf [file c9na00471h1.pdf]

## Supporting Information

### High-Performance Ultra-Violet Phototransistors Based on CVT-Grown High Quality SnS<sub>2</sub> Flakes

Haoting Ying, Xin Li, Yutong Wu, Yi Yao, Junhua Xi, Weitao Su, Chengchao Jin, Minxuan Xu, Zhiwei He, Qi Zhang,

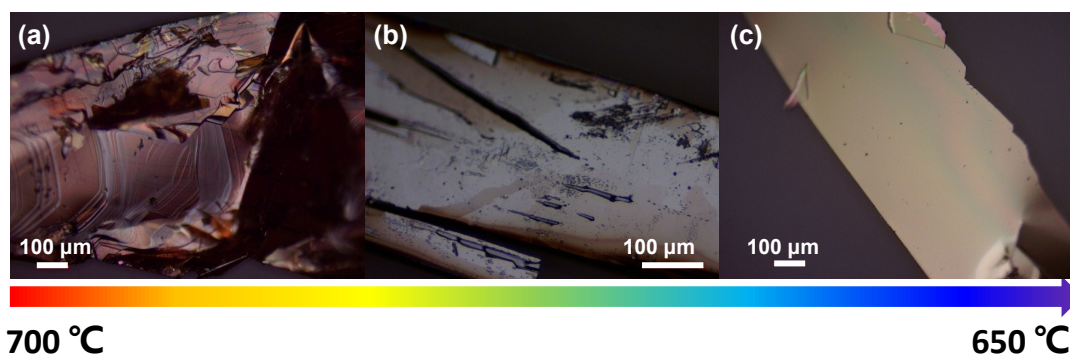

**Figure S1.** The temperature gradient effect on the final products

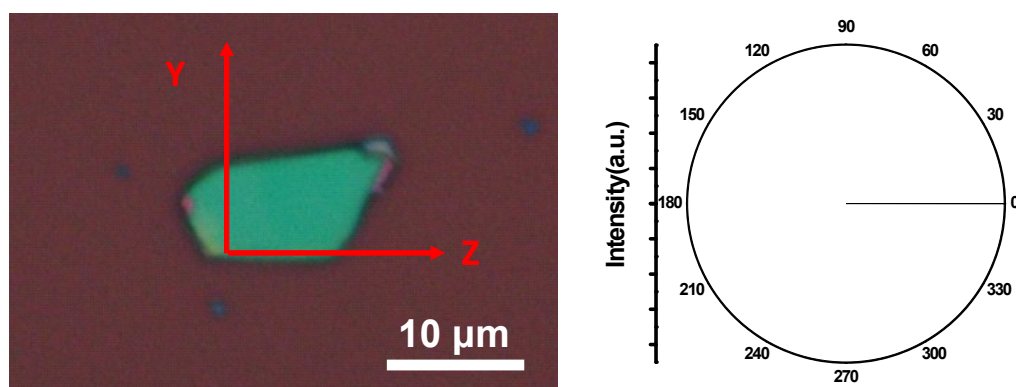

**Figure S2.** Polarized Raman characterization of A<sub>1g</sub> vibration mode.

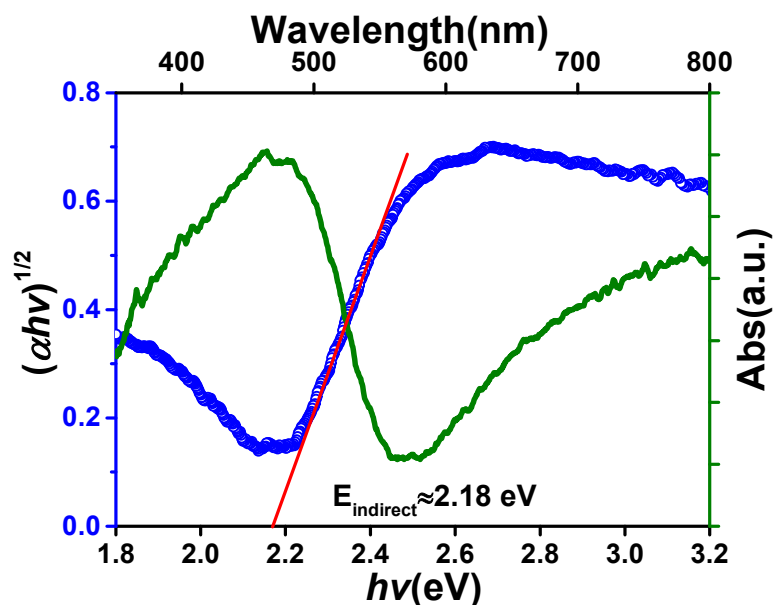

**Figure S3.** UV–vis absorption spectrum of SnS<sub>2</sub> flakes located on SiO<sub>2</sub>/Si substrates with a Kubelka–Munk (K–M) transformation to the bandgap.

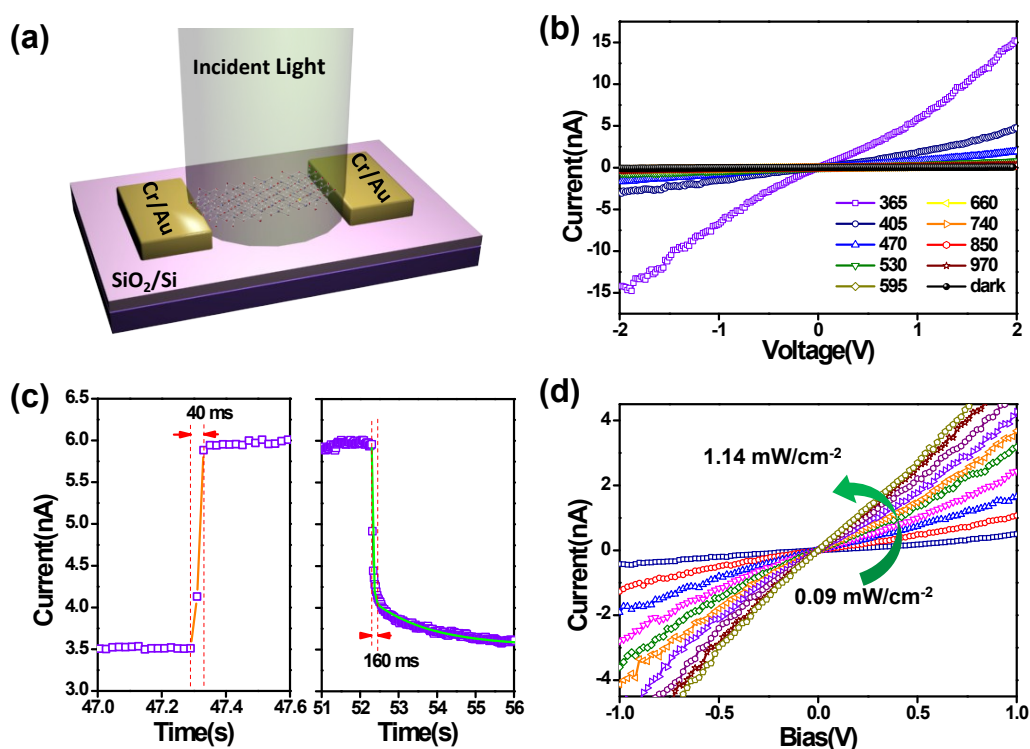

**Figure S4.** a) The layout of the two-terminal photodetectors based on individual SnS<sub>2</sub> flakes. b) The current versus voltage (I–V) plots of the photodetector in darkness and under incident light of different wavelengths. c) Enlarged views of the rise and decay sides from Figure 4c. d) Light intensity dependent I–V characteristics.

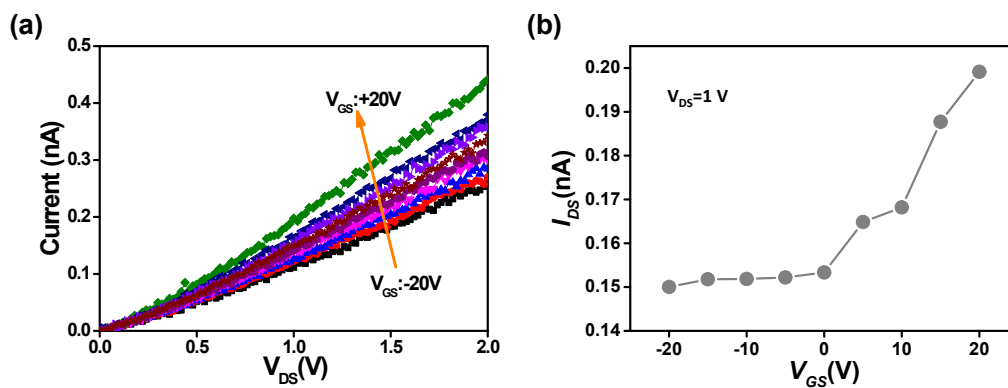

**Figure S5.** The (a) output and (b) transfer characteristics of SnS<sub>2</sub> flake based transistor measured in darkness.
